# Supplementary material
Source: PubMed Central journal article supplement (PMC9037609)
Supplement: NIHMS1792592-supplement-Supplementary_materials.pdf [file NIHMS1792592-supplement-Supplementary_materials.pdf]

## Supplementary Data

### Progressive accumulation of epigenetic heterogeneity during human ES cell culture

Borko Tanasijevic, Bo Dai, Toshihiko Ezashi, Kimberly Livingston, R. Michael Roberts, and Theodore P. Rasmussen

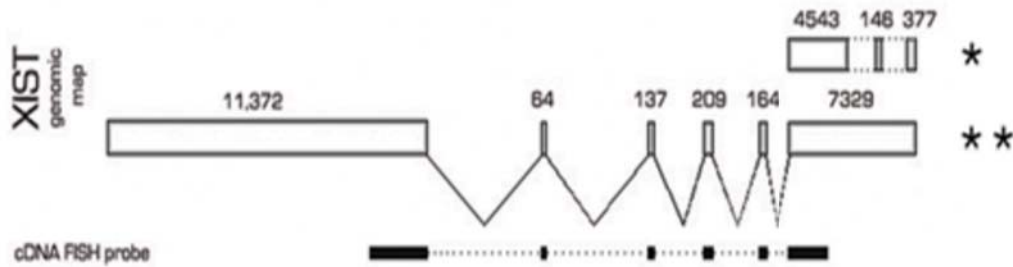

**Figure S1.** Structure of the XIST gene on Xq13.2 with exon sizes shown from 5' end on the left. cDNA sequence used for preparation of the RNA FISH probe is shown in closed boxes. The 3' end of XIST has been reported to contain either three small exons (\*) (15) or a single 3' terminal exon (\*\*) (Ensembl human genome database).

**Table S1. Primer sequences used in the study**

| Gene Symbol |   | Primer sequence (5' - 3') |
|-------------|---|---------------------------|
| XIST        | F | TCTCGGAGAAGGATGTCAAAAGA   |
|             | R | GGACACATGCAGCGTGGTAT      |
| POU5F1      | F | CCCCTGGTGCCGTGAAG         |
|             | R | CTCGAGTTCTTTCTGCAGAGCTT   |
| ACTB        | F | GGCACCCAGCACAAATGAAG      |
|             | R | GCCGATCCACACGGAGTACT      |
| GAPDH       | F | GAGTCAACGGATTTGGTCGT      |
|             | R | TTGATTTTGGAGGGATCTCG      |
| GATA2       | F | CCCACCTACCCCTCCTATGT      |
|             | R | TGCCCATTCATCTTGTGGTA      |
| GCM1        | F | CGCAATACCAACAACCACAA      |
|             | R | CAAGGGGATGAGCTTCAGAGG     |
| DFc*        |   | GTGGATCGAATTCTGCCAGT      |
| DFg*        |   | GCTAAACTTGCCTTACTGCTTTTT  |
| DRcg*       |   | TCTTTCTCTCTGGCCTGCAC      |
| Dseq*       |   | AAGGCCACAAAGTCTGCATC      |
| WFcg*       |   | GCAGTGGAAGTATGAAGACC      |
| WRg*        |   | GAGGTTTCCCGGAGAAGAAA      |
| WRc*        |   | GCAAAGGCATTCTTTCGAG       |
| Wseq*       |   | TGAAAGATCAAGGAGATCAGCA    |

F-forward; R-Reverse; \* see text for details

**Table S2. Genotyping and expression analysis of polymorphic SNPs from two X-linked genes in H9 hESCs**

| Sample name                  | Gene name (SNP ID) |                    |
|------------------------------|--------------------|--------------------|
|                              | DMD (rs228406)     | WDR44 (rs10521584) |
| <b>gDNA</b>                  |                    |                    |
| H9 p47                       | biallelic          | biallelic          |
| H9 p48 (4% O <sub>2</sub> )  | biallelic          | n/a                |
| H9 p48 (20% O <sub>2</sub> ) | biallelic          | biallelic          |
| H9 p54 (4% O <sub>2</sub> )  | biallelic          | biallelic          |
| H9 p54 (20% O <sub>2</sub> ) | biallelic          | n/a                |
| <b>cDNA</b>                  |                    |                    |
| H9 p32 d1                    | biallelic          | biallelic          |
| H9 p32 d3                    | biallelic          | biallelic          |
| H9 p32 d5                    | biallelic          | biallelic          |
| H9 p33 d1                    | biallelic          | n/a                |
| H9 p33 d3                    | biallelic          | biallelic          |
| H9 p33 d5                    | biallelic          | biallelic          |
| H9 p33 d7                    | biallelic          | biallelic          |
| H9 p47 col1                  | n/a                | biallelic          |
| H9 p47 col2                  | n/a                | biallelic          |
| H9 p47 col3                  | biallelic          | biallelic          |
| H9 p47 col4                  | n/a                | biallelic          |
| H9 p47 col5                  | biallelic          | biallelic          |
| H9 p47 col6                  | biallelic          | biallelic          |
| H9 p47 col7                  | biallelic          | biallelic          |
| H9 p47 col8                  | n/a                | biallelic          |
| H9 p47 col9                  | biallelic          | biallelic          |

**Table S3. Antibodies used for NU-ELISA**

| Epitope        | Host <sup>a</sup> | Type <sup>b</sup> | Source        | Catalog # | Working Concentration |
|----------------|-------------------|-------------------|---------------|-----------|-----------------------|
| H2A            | Rb                | P                 | IMGENEX       | IMG-358   | 1:1,000               |
| H3K4me3        | Rb                | M                 | Upstate       | 05-745    | 1:1,000               |
| H3K9me1        | Rb                | P                 | Upstate       | 07-450    | 1:1,000               |
| H3K9me3        | Rb                | P                 | Upstate       | 07-442    | 1:1,000               |
| H3K36me3       | Rb                | P                 | Abcam         | Ab9050    | 1:1,000               |
| H3K79me2       | Rb                | M                 | Upstate       | 05-835    | 1:1,000               |
| H4K20me3       | Rb                | P                 | Upstate       | 07-463    | 1:1,000               |
| MACROH2A1      | Rb                | P                 | Rasmussen Lab | -         | 1:1,000               |
| HRP Gt anti-Rb | Gt                | P                 | Pierce        | 31460     | 1:5,000               |

<sup>a</sup>Rb=Rabbit, Gt=Goat. <sup>b</sup>P=Polyclonal IgG, M=Monoclonal IgG.

**Table S4. H9 hESCs low passage (p45) and high passage(p113) relative PTM values**

| PTM       | <sup>a</sup> Mean of H9 P45 PTM | <sup>b</sup> SD of H9 P45 PTM | <sup>a</sup> Mean of H9 P113 PTM | <sup>b</sup> SD of H9 P113 PTM |
|-----------|---------------------------------|-------------------------------|----------------------------------|--------------------------------|
| H3K4me3   | 0.774                           | 0.085                         | 0.845                            | 0.016                          |
| H3K9me1   | 0.838                           | 0.124                         | 0.799                            | 0.098                          |
| H3K9me3   | 0.485                           | 0.049                         | 0.553                            | 0.058                          |
| H3K36me3  | 3.289                           | 0.955                         | 3.278                            | 0.358                          |
| H3K79me2  | 1.743                           | 0.526                         | 1.777                            | 0.389                          |
| H4K20me3  | 1.162                           | 0.182                         | 1.041                            | 0.065                          |
| MACROH2A1 | 0.648                           | 0.073                         | 0.829                            | 0.151                          |

<sup>a</sup>Mean of 4 biological replicates on ELISA plates. The relative PTM values of each cell passage were calculated as the ELISA signal (after background subtraction) divided by the H2A content from the same wells and rows (after background subtraction).

<sup>b</sup>Standard deviations (SD) of each cell passage PTM
